# Supplementary material for: Elastic moduli of normal and cancer cell membranes revealed by molecular dynamics simulations
Source: Royal Society of Chemistry journal article supplement (doi:10.1039/d1cp04836h), 2022-01-01
Supplement: d1cp04836h1.pdf [file d1cp04836h1.pdf]

# Supporting Information

## Elastic Moduli of Normal and Cancer Cell Membranes Revealed by Molecular Dynamics Simulations

Hoang Linh Nguyen,<sup>†</sup> Viet Hoang Man,<sup>‡</sup> Mai Suan Li,<sup>¶,†</sup> Philippe Derreumaux,<sup>§</sup>  
Junmei Wang,<sup>‡</sup> and Phuong H. Nguyen<sup>\*,§</sup>

<sup>†</sup>*Institute for Computational Science and Technology, SBI Building, Quang Trung Software  
City, Tan Chanh Hiep Ward, District 12, Ho Chi Minh City, Vietnam*

<sup>‡</sup>*Department of Pharmaceutical Sciences, School of Pharmacy, University of Pittsburgh,  
Pittsburgh, PA 15213, USA*

<sup>¶</sup>*Institute of Physics, Polish Academy of Sciences, Al. Lotnikow 32/46, 02-668 Warsaw,  
Poland*

<sup>§</sup>*CNRS, Université de Paris, UPR9080, Laboratoire de Biochimie Théorique, Paris,  
France ; Institut de Biologie Physico-Chimique, Fondation Edmond de Rothschild, PSL  
Research University, Paris, France*

E-mail: [nguyen@ibpc.fr](mailto:nguyen@ibpc.fr)

To see whether the structure of membranes has relaxed to a reasonable state and is stable during the simulation timescale of 1 microsecond, we calculate the time evolution and the histogram distribution of the area per lipid ( $A_L$ ) of lipids pertaining to the inner and outer leaflets. The results are shown in Figures S1 and S4 for the normal and cancer membrane

models, respectively. As seen, the area per lipid of all membrane models undergoes some fluctuations within the first 400 ns before converging to a stable value. The histogram distribution of the time evolution of area per lipid shows a Gaussian-like shape with the standard deviation of  $\pm 1 \text{ \AA}^2$ . We note that because our membrane models have the same number of lipids in each leaflet, therefore, the area per lipid for the two leaflets are kind of forced to be the same, and this is reflected by the similar results of the two leaflets shown in Figures S1 and S4.

We also calculate the time evolution and distribution of the membrane thickness, and the results are shown in Figures S3 and S4 for the normal and cancer models, respectively. Again, the membrane thickness fluctuates within the first 400 ns and then converges to a stable value. The histogram distribution shows a Gaussian-like shape with the standard deviation of  $\pm 0.1 \text{ nm}$ .

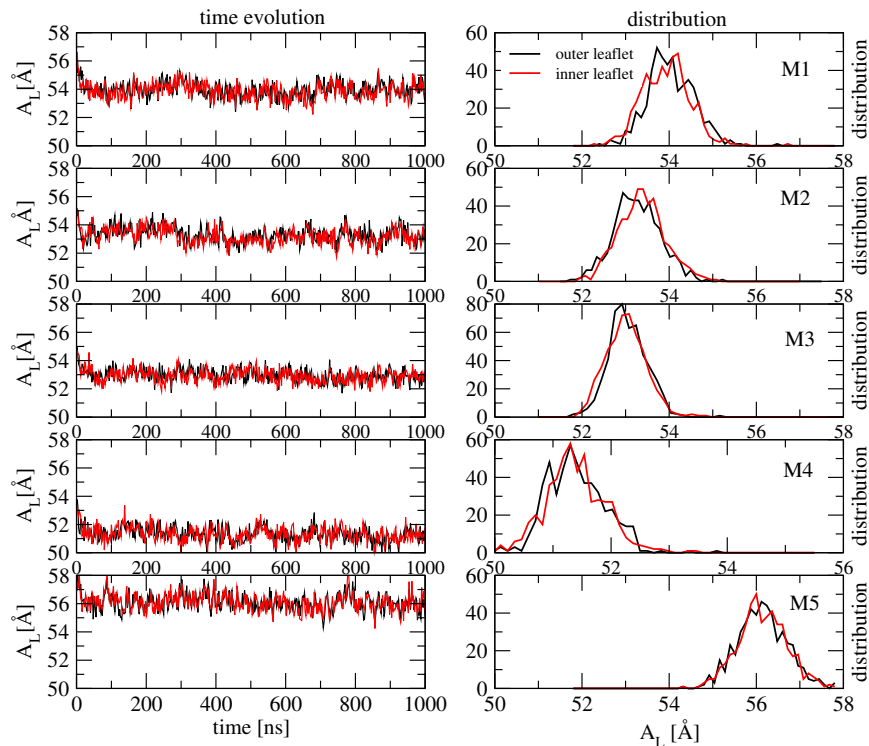

Figure S1: The time evolution (left panels) and distribution (right panels) of the area per lipid of five normal membrane models, M1 $\cdots$ M5. The area per lipid is shown for the outer and inner leaflets. Shown are results at 300 K.

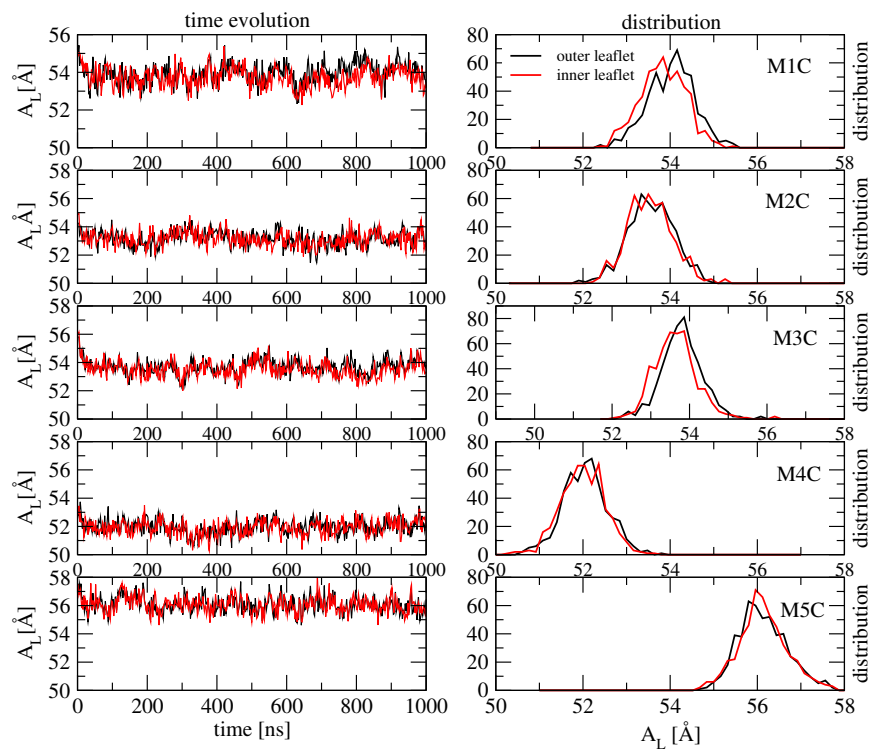

Figure S2: The time evolution (left panels) and distribution (right panels) of the area per lipid of five normal membrane models, M1\*...M5\*. The area per lipid is shown for the outer and inner leaflets. Shown are results at 300 K.

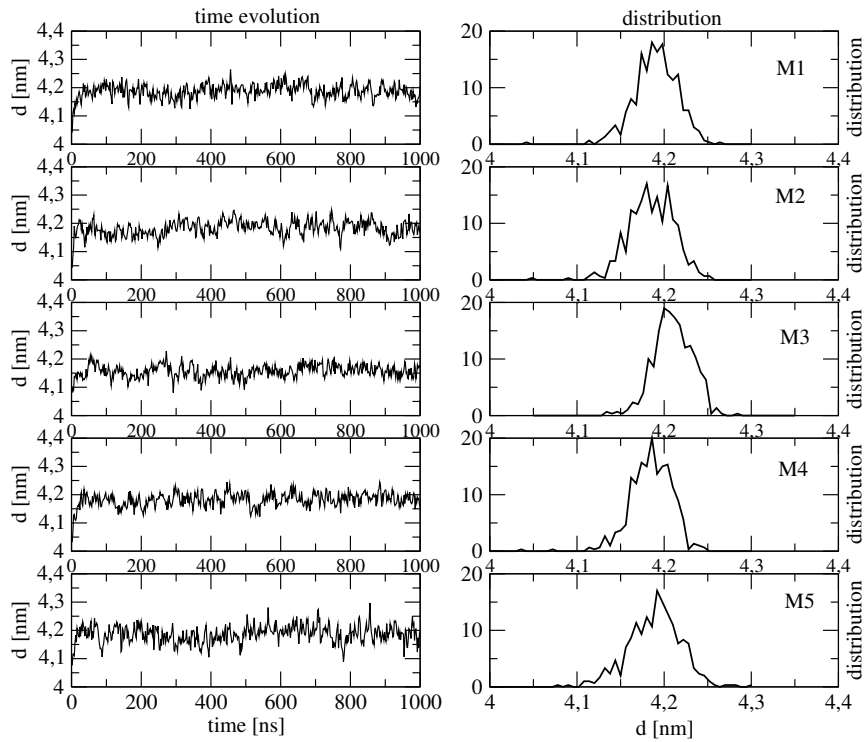

Figure S3: The time evolution (left panels) and distribution (right panels) of the thickness of five normal membrane models, M1...M5. Shown are results at 300 K.

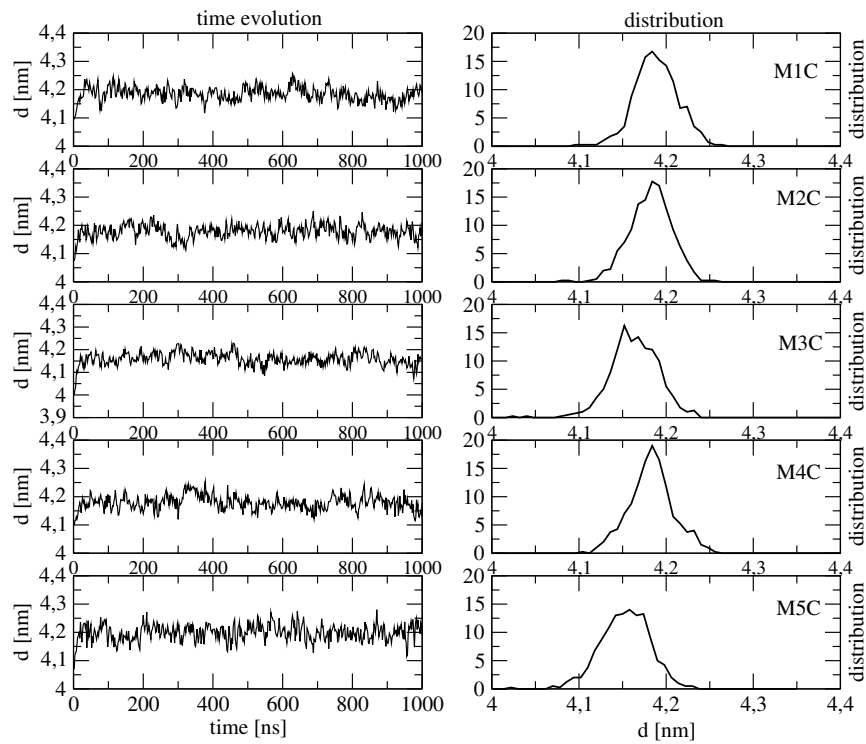

Figure S4: The time evolution (left panels) and distribution (right panels) of the thickness of five cancer membrane models, M1\*...M5\*. Shown are results at 300 K.
